# Supplementary material for: Mental Health Conditions Among Children and Adolescents With a COVID-19 Diagnosis
Source: Atypon-hosted journal article supplement (doi:10.1176/appi.ps.202100646), 2022-06-02
Supplement: appi.ps.202100646.ds001.pdf [file appi.ps.202100646.ds001.pdf]

For this analysis, data from December 2018 through April 2021 were drawn from IQVIA US Open Source Claims, a multi-payer (Medicaid, Medicare and private insurance, including employer-sponsored and individual market), patient linked database consisting of professional claims generated by office-based physicians (CMS-1500), institutional claims generated by hospitals and other institutions (UB-04), and longitudinal prescription (LRx) claims. The database covers over 180 million patients from all 50 states and Washington, D.C. More information on IQVIA data is available here: <https://www.iqvia.com/solutions/real-world-evidence/real-world-data-and-insights>.

### Mental Health Conditions<sup>1</sup> after COVID-19 Diagnosis by Age

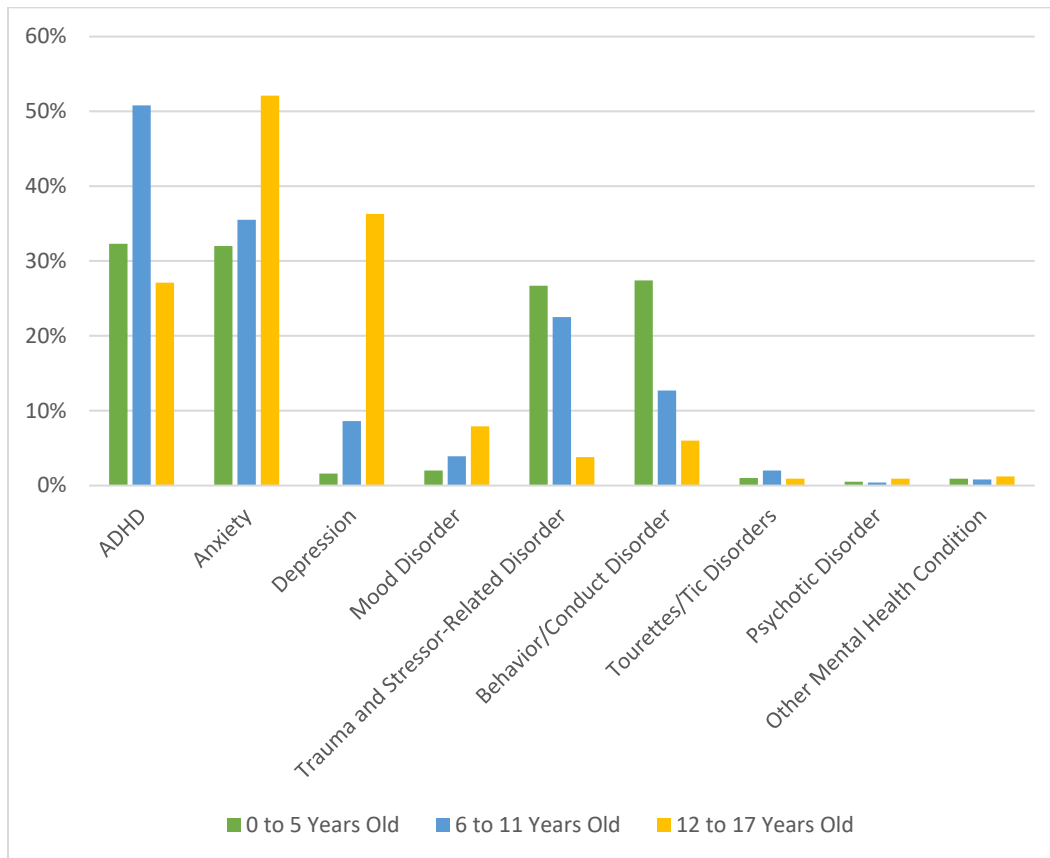

1. ADHD (ICD-10: F90), Anxiety (ICD-10: F40-42,F44-48,F93), Depression (ICD-10: F32,F33), Behavior/Conduct Disorder (ICD-10: F91,F94,F63), Trauma/Stressor Related Disorder (ICD-10: F43), Mood Disorder (ICD-10: F30, F31, F34-39), Tourettes/Tic Disorder (ICD-10: F95), Psychotic Disorder (ICD-10: F20-22,F60), Other Mental Health Condition (ICD-10: F99,F53,F68).
